# Supplementary material for: Al2O3-modified Ti–Mn–O nanocomposite coated with nitrogen-doped carbon as anode material for high power lithium-ion battery
Source: Royal Society of Chemistry journal article supplement (doi:10.1039/c6ra03884k), 2016-01-01
Supplement: c6ra03884k1.pdf [file c6ra03884k1.pdf]

**Al<sub>2</sub>O<sub>3</sub>-modified Ti-Mn-O nanocomposite coated with nitrogen-doped carbon as anode material  
for high power lithium-ion battery**

Xue Bai, Tao Li, Xin-Yi Zhao, Dong Shen, Ning Lun, Yong-Xin Qi\*, Yu-Jun Bai\*

Key Laboratory for Liquid–Solid Structural Evolution and Processing of Materials (Ministry of Education), Shandong University, Jinan 250061, PR China

\*Corresponding author. Tel/Fax: +86 531 88392315. E-mail address: [byj97@126.com](mailto:byj97@126.com) (Y.-J. Bai);  
[lunning66@sdu.edu.cn](mailto:lunning66@sdu.edu.cn) (N. Lun).

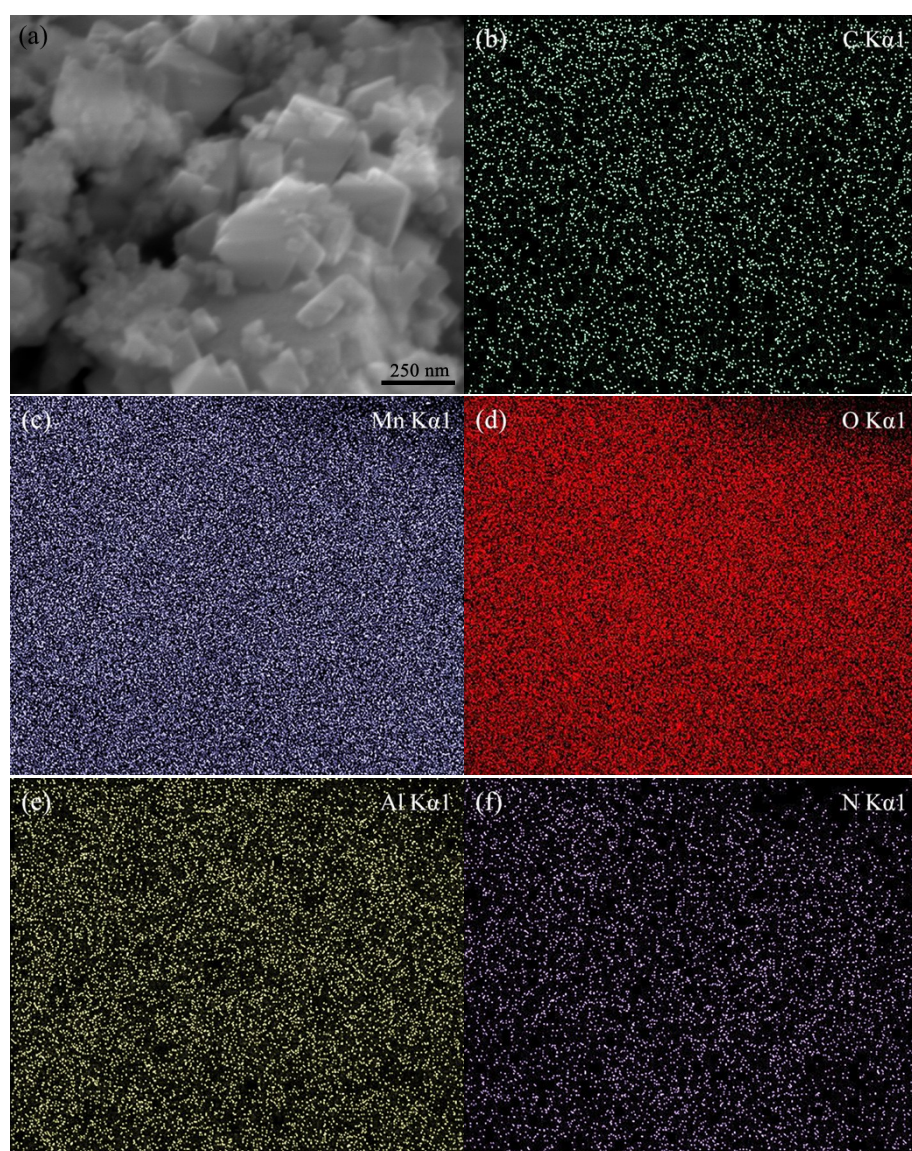

**Fig. A1** FESEM image and the corresponding elemental mappings of S3.

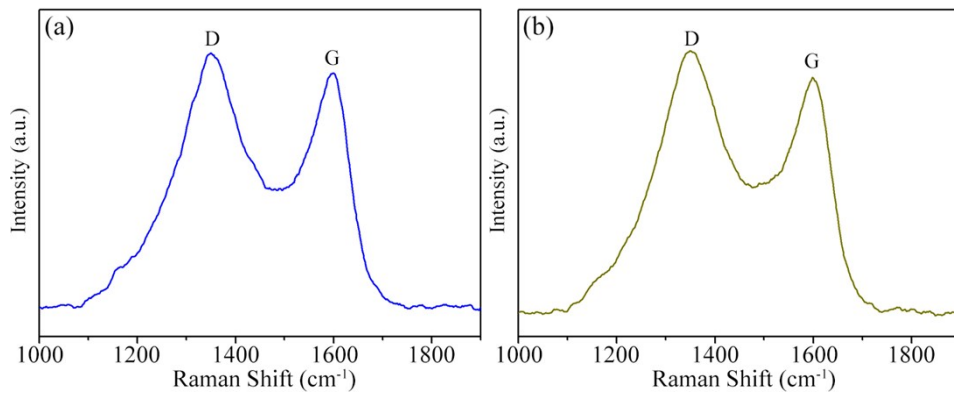

**Fig. A2** Raman spectra of S2 (a) and S3 (b).

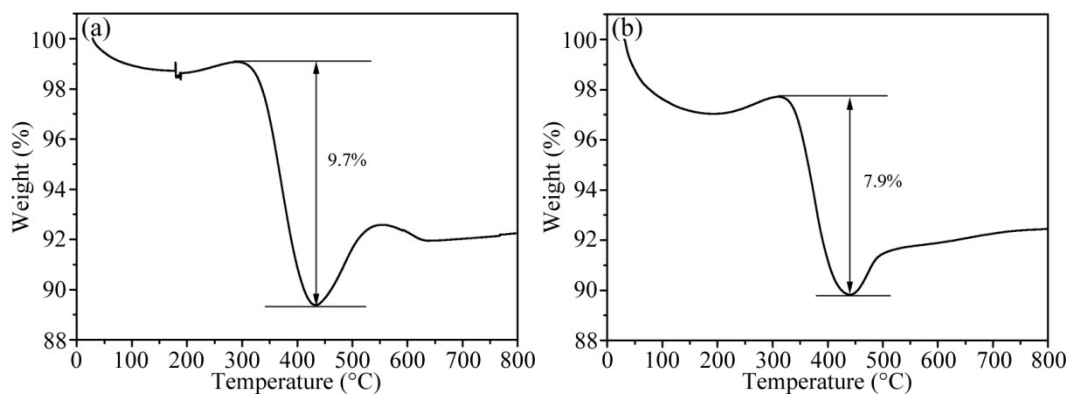

**Fig. A3** TG curves of S2 (a) and S3 (b).

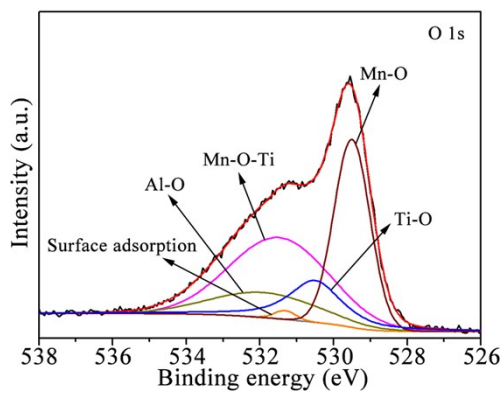

**Fig. A4** XPS spectrum of O1s for S1.
